# Supplementary material
Source: PubMed Central journal article supplement (PMC4567653)

# Figure S1

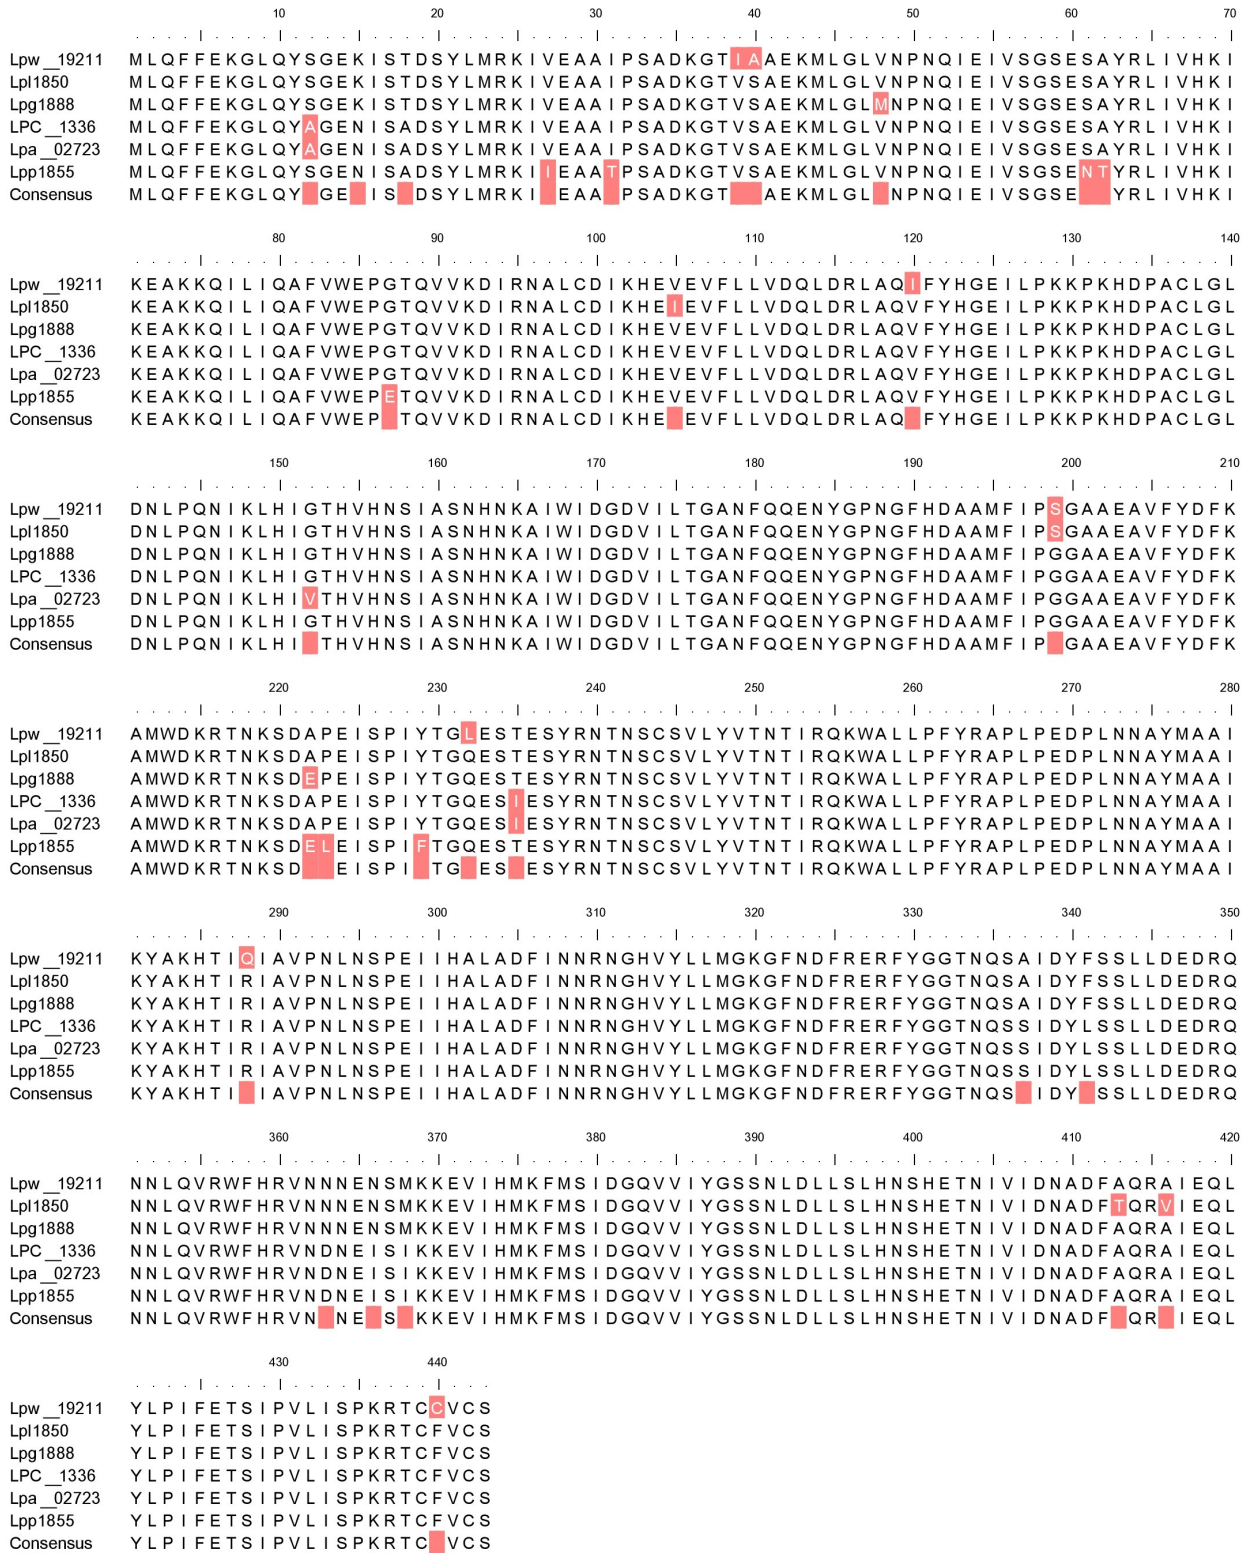

**Figure S2**

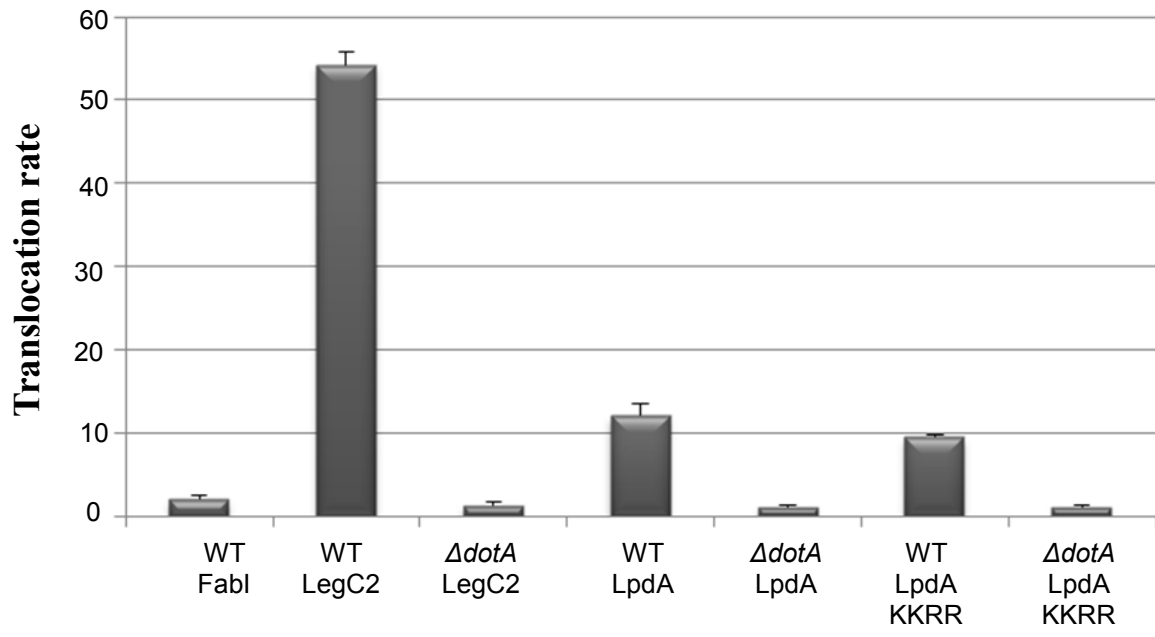

Figure S3

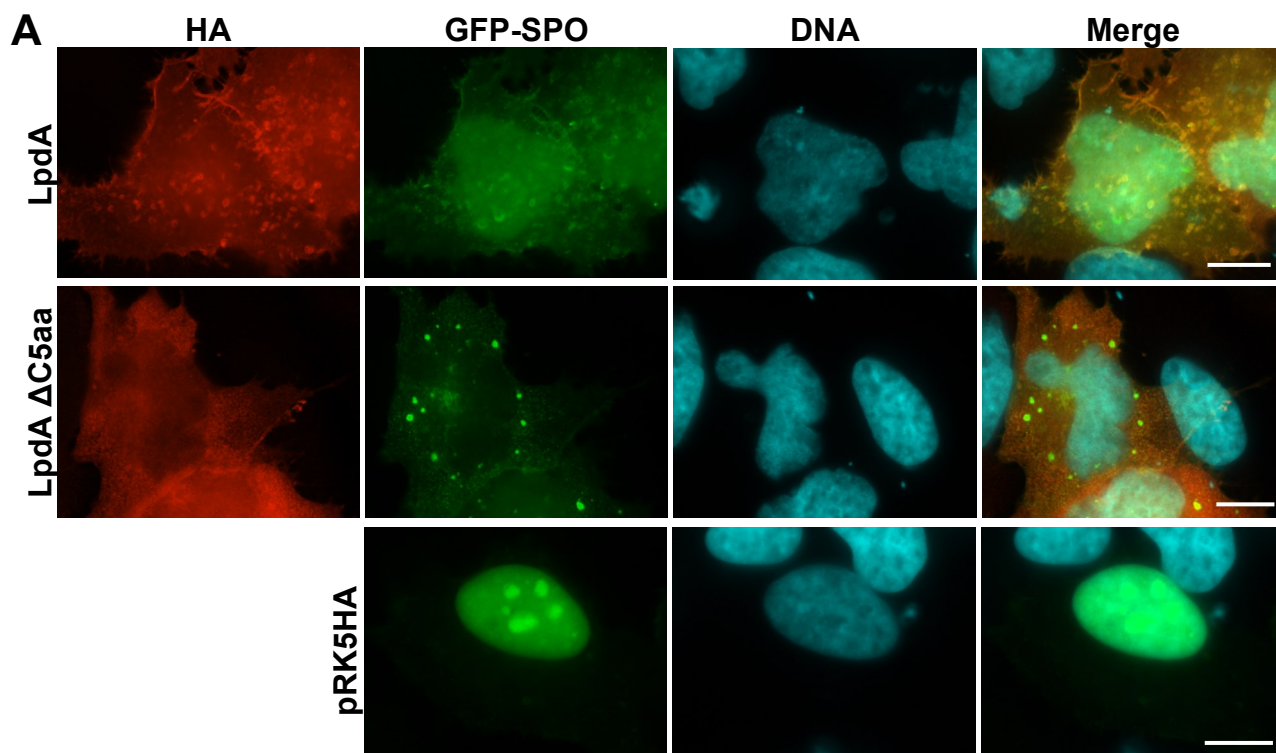

**Figure S4**

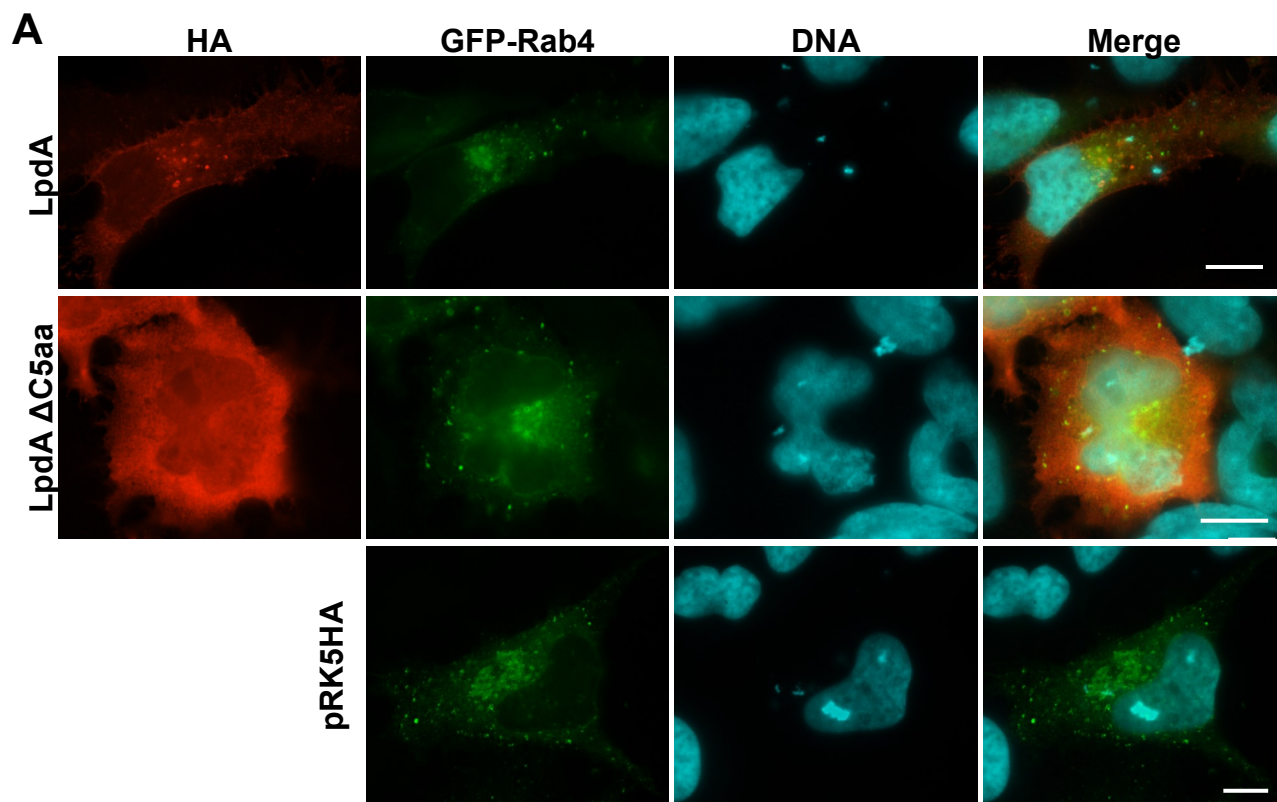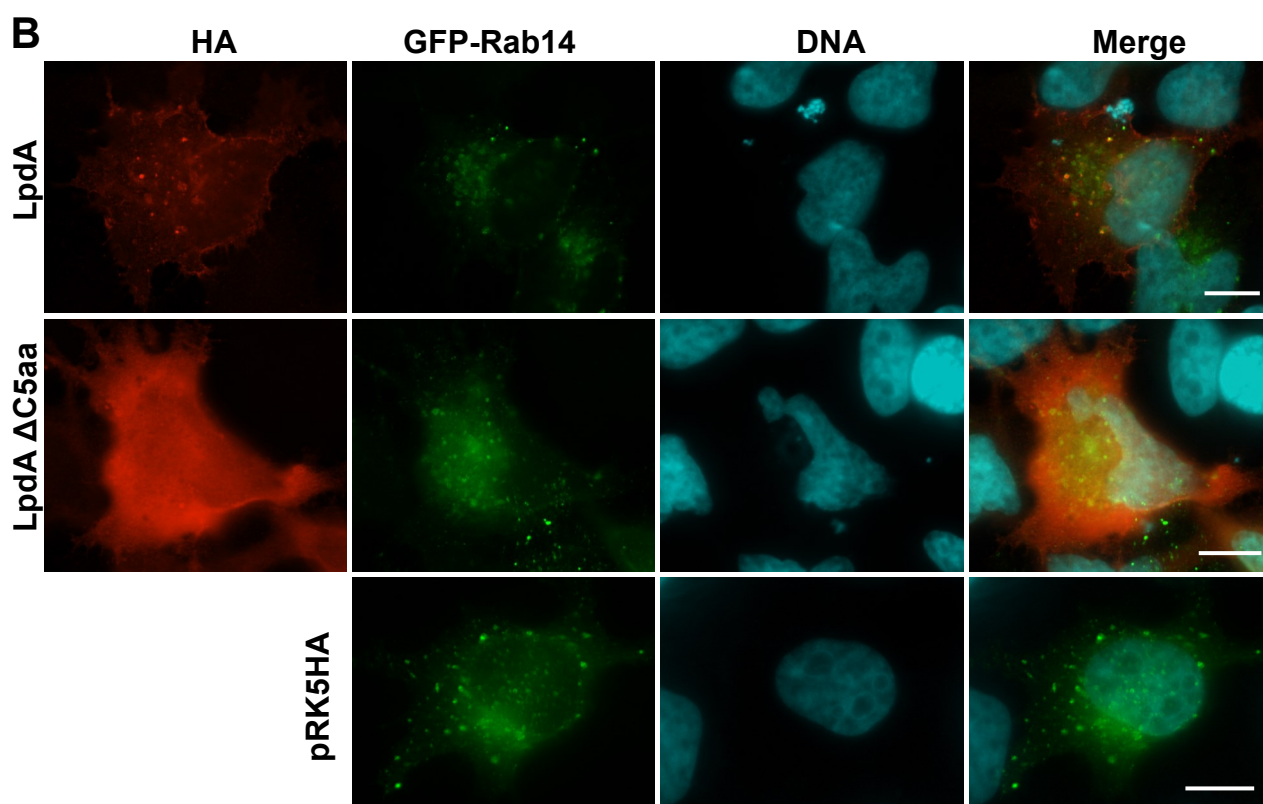

**Figure S5**

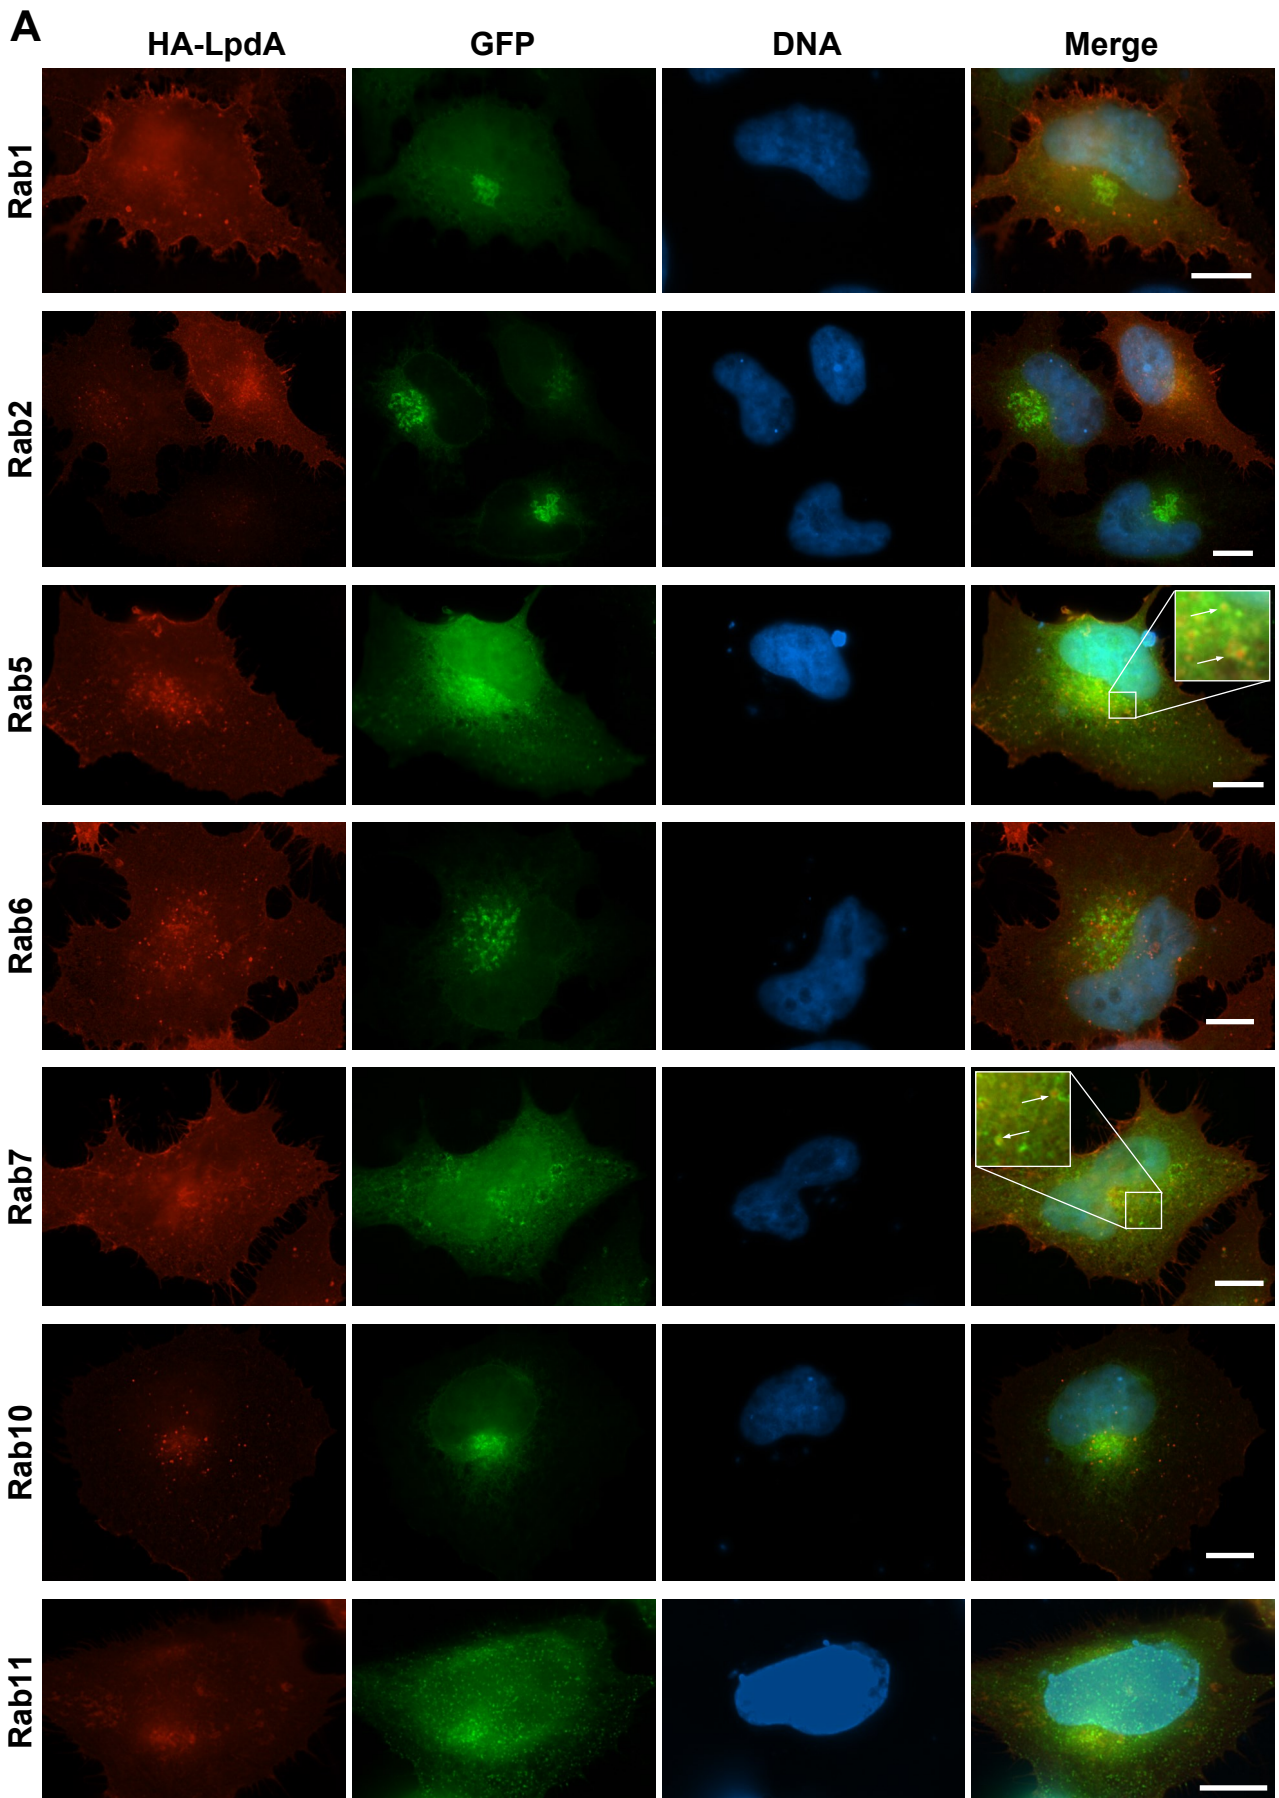

**Figure S5**

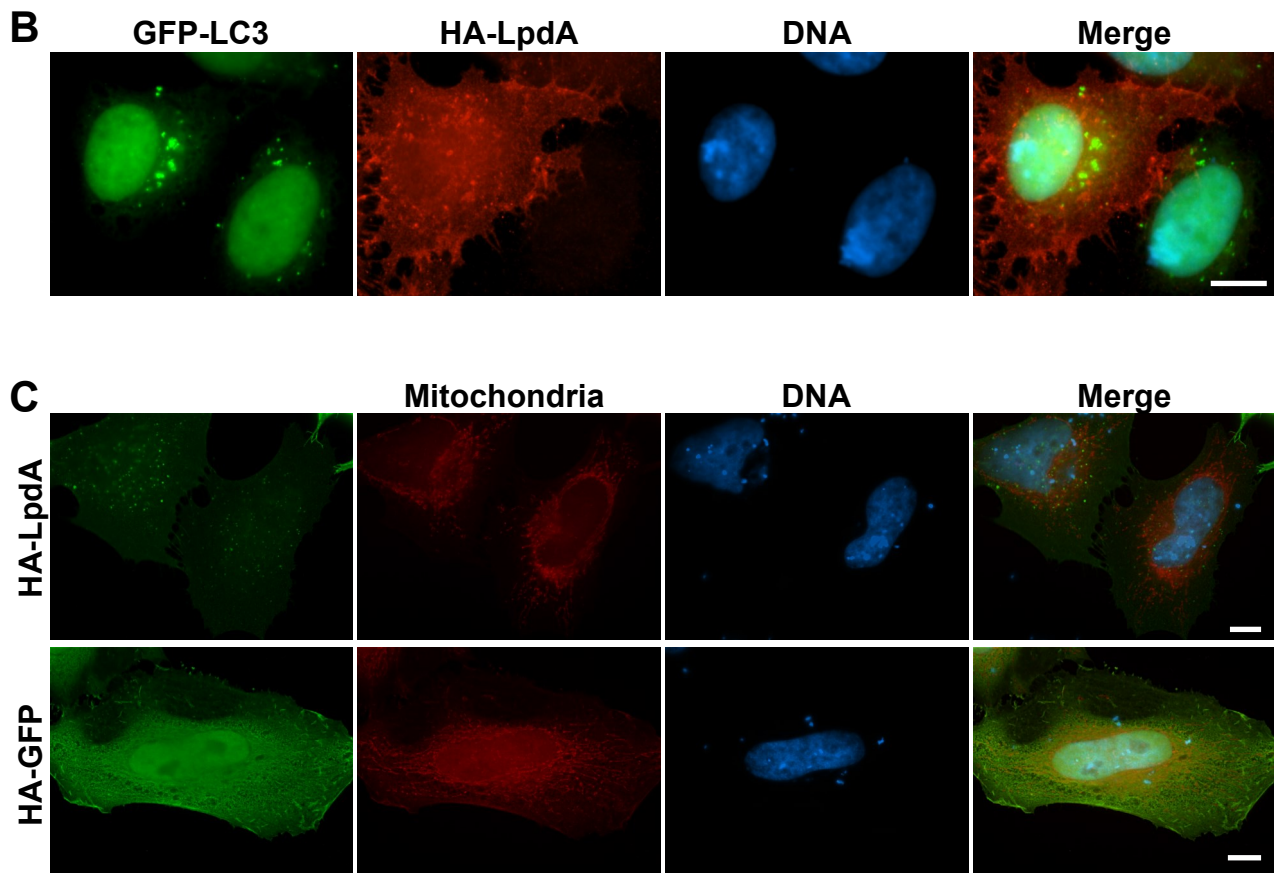

**Figure S6**

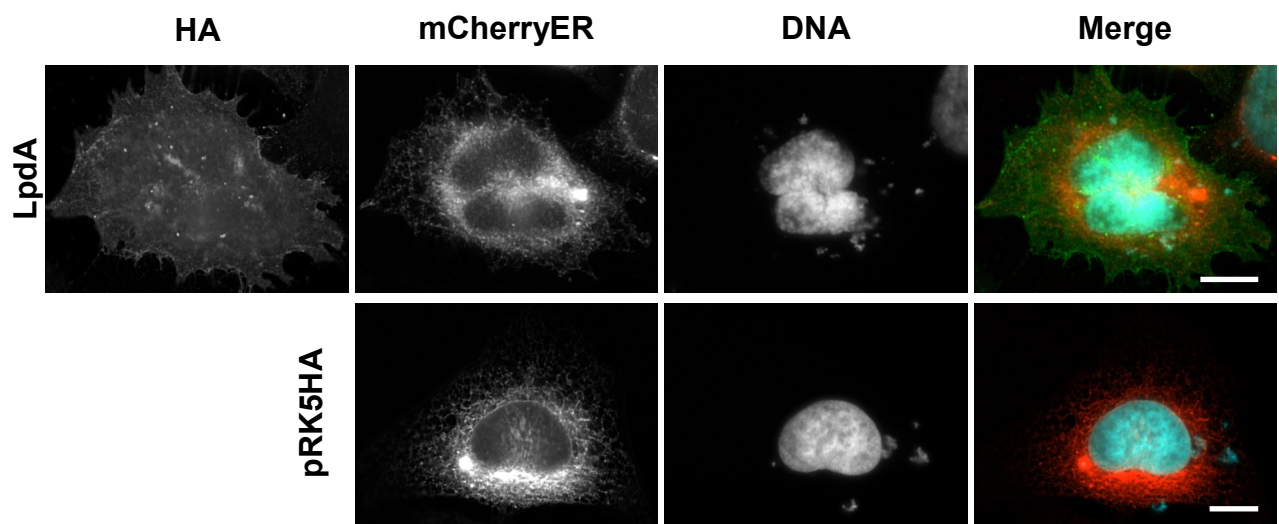

**Figure S7**

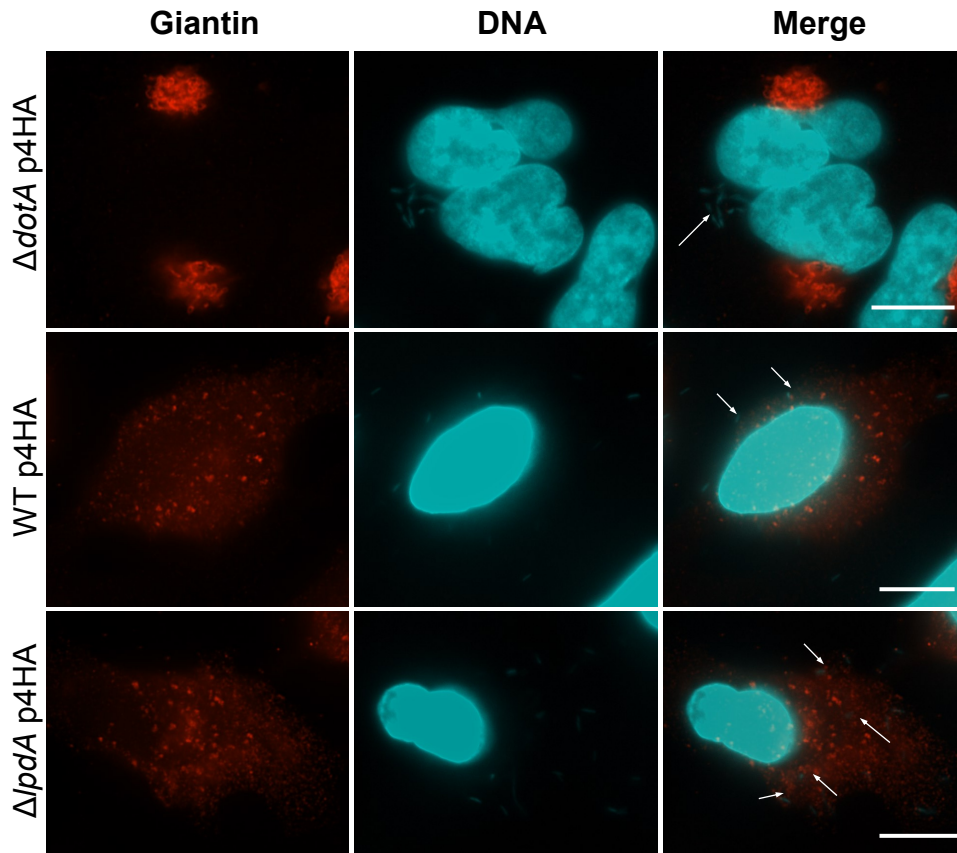



**Figure S8**

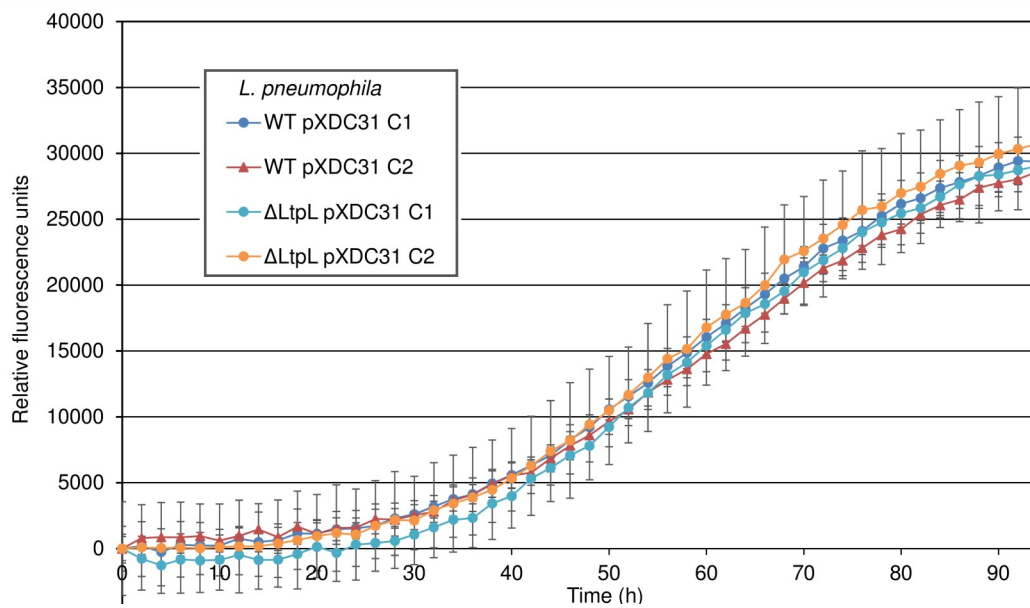

Supplement: IAI.00785-15_zii999091413so1.pdf [file IAI.00785-15_zii999091413so1.pdf]
